# Supplementary material for: Genomic Surveillance of SARS-CoV-2 Variants That Emerged in South and Southeast Asia during Early 2022
Source: MDPI journal article supplement (doi:10.3390/v15061355), 2023-06-12
Supplement: s1 [file s1]

## Supplementary Material

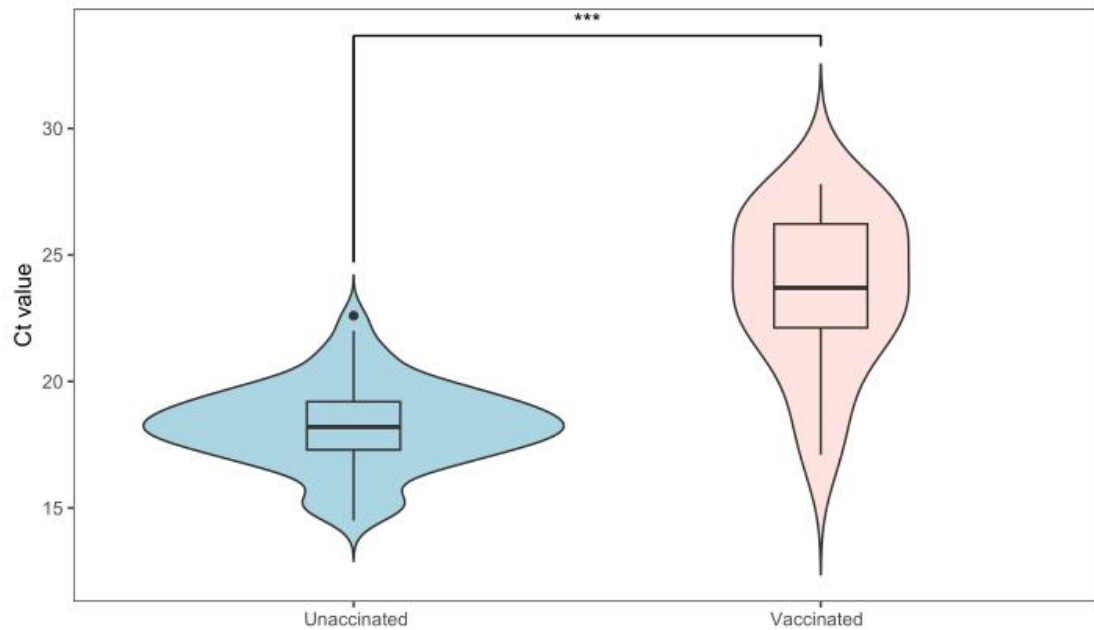

**Figure S1. Distribution of Ct values of positive swabs from unvaccinated and vaccinated COVID-19 samples.** The graph shows the distribution of Ct values, with the boxplot displaying the median, upper and lower quartiles, and whiskers extending to the maximum and minimum values. The violin plot displays the distribution of specific Ct values. Ct values between the unvaccinated and vaccinated groups are statistically significant (t-test, \*\*\*  $p < 0.001$ ).
