# Supplementary material for: Genomic Surveillance of SARS-CoV-2 Variants That Emerged in South and Southeast Asia during Early 2022
Source: Viruses. 2023 Jun 12;15(6):1355. doi: 10.3390/v15061355 (PMC10301783; doi:10.3390/v15061355)
Supplement: Supplementary file 1 [file viruses-15-01355-s001.zip › Table S1.xlsx]

## Sheet: Sheet2
Table S1.Sequencing information of COVID-19 samples. The table contains basic information about the patient, the Ct value of the sample, sequencing quality, sequencing depth, sample size, and Lineage. All samples with genome coverage above 70%.
GISAID virus name	Collection date	country	age	gender	race	The time of the previous first dose	type of first dose	second dose	Previous second dose type	Wuhan Institute IC Ct value	Q30	1x coverage	sample size	Lineage
hCov-19/PAK/Patient-1/2022	2022-01-03	Pakistan	44	Male	Asian	07-Jun-2021	CoronaVac	25-Jul-2021	CoronaVac	22.2	91.67	79.8	0.547202	B
hCov-19/PAK/Patient-2/2021	2021-12-17	Pakistan	25	Male	Asian	05-May-2021	CoronaVac	02-Jun-2021	CoronaVac	24.5	91.36	96.71	0.378134	B.1
hCov-19/PHI/Patient-3/2021	2021-12-28	Philippines	64	Male	Asian	Not vaccinated				22	92.24	99.75	1.43552	AY.103
hCov-19/PHI/Patient-4/2021	2021-12-21	Philippines	43	Male	Asian	Not vaccinated				19.5	91.31	72.21	1.99244	BA.1
hCov-19/PHI/Patient-5/2021	2021-10-15	Philippines	37	Male	Asian	Not vaccinated				21.3	91.41	84.06	1.24421	B.1
hCov-19/PHI/Patient-6/2021	2021-10-05	Philippines	21	Male	Asian	Not vaccinated				15	91.12	99.6	0.932601	B.1
hCov-19/PHI/Patient-7/2022	2022-01-04	Philippines	20	Female	Asian	Not vaccinated				16.7	92.43	99.75	1.23852	BA.2
hCov-19/PHI/Patient-8/2021	2021-12-29	Philippines	23	Female	Asian	Not vaccinated				18.6	90.43	90.01	1.03685	BA.2
hCov-19/PHI/Patient-9/2022	2022-01-04	Philippines	32	Female	Asian	Not vaccinated				16.1	91.08	98.19	0.899545	BA.2
hCov-19/PHI/Patient-10/2022	2022-01-03	Philippines	22	Male	Asian	Not vaccinated				17.2	92.36	99.75	2	BA.2
hCov-19/PHI/Patient-11/2022	2022-01-04	Philippines	43	Female	Asian	Not vaccinated				17	92.26	99.26	0.908571	BA.2
hCov-19/MAL/Patient-12/2021	2021-12-04	Malaysia	22	Male	Asian	06-Jul-2021	CoronaVac	27-Jul-2021	CoronaVac	21.9	92.58	99.75	2	B.1
hCov-19/PHI/Patient-13/2021	2021-11-25	Philippines	46	Male	Asian	Not vaccinated				15.1	90.86	74.33	0.451424	B
hCov-19/PHI/Patient-14/2021	2021-12-28	Philippines	19	Male	Asian	Not vaccinated				15.1	91.01	98.66	0.431446	B.1
hCov-19/PHI/Patient-15/2021	2021-12-28	Philippines	27	Female	Asian	Not vaccinated				20	91.44	96.64	1.23833	BA.2
hCov-19/PHI/Patient-16/2021	2021-12-29	Philippines	20	Male	Asian	Not vaccinated				15.3	91.44	97.54	0.626293	BA.2
hCov-19/PHI/Patient-17/2021	2021-12-28	Philippines	20	Female	Asian	Not vaccinated				18.4	91.97	78.29	2	B
hCov-19/MAL/Patient-18/2022	2022-01-11	Malaysia	23	Male	Asian	10-Jul-2021	CoronaVac	31-Jul-2021	CoronaVac	18.9	91.92	99.75	1.06521	B.1
hCov-19/PHI/Patient-19/2021	2021-11-17	Philippines	24	Female	Asian	Not vaccinated				16.7	92.81	75.09	1.40981	B
hCov-19/PHI/Patient-20/2021	2021-12-28	Philippines	23	Male	Asian	Not vaccinated				19.8	91.35	72.37	2	B
hCov-19/PHI/Patient-21/2021	2021-11-27	Philippines	19	Male	Asian	Not vaccinated				17.4	91.43	99.6	1.66245	B.1
hCov-19/PHI/Patient-22/2021	2021-12-09	Philippines	32	Male	Asian	Not vaccinated				14.5	91.32	89.27	1.15783	BA.2
hCov-19/PAK/Patient-23/2022	2022-01-12	Pakistan	22	Male	Asian	27-Apr-2021	CoronaVac	30-May-2021	CoronaVac	22.4	91.22	77.38	0.642659	BA.1
hCov-19/PHI/Patient-24/2021	2021-12-29	Philippines	37	Male	Asian	Not vaccinated				17.1	90.88	69.42	0.826646	B
hCov-19/PHI/Patient-25/2021	2021-12-20	Philippines	33	Female	Asian	Not vaccinated				22.6	91.27	96.42	1.00434	B.1
hCov-19/PHI/Patient-26/2022	2022-01-03	Philippines	32	Male	Asian	Not vaccinated				15	92.79	99.75	2	BA.2
hCov-19/PHI/Patient-27/2022	2022-01-03	Philippines	51	Female	Asian	Not vaccinated				19.5	91.12	99.43	0.938833	BA.2
hCov-19/PHI/Patient-28/2022	2022-01-03	Philippines	46	Female	Asian	Not vaccinated				17.8	93.24	99.75	2	BA.2
hCov-19/PHI/Patient-29/2021	2021-12-28	Philippines	46	Female	Asian	Not vaccinated				17.1	91.14	70.27	1.26591	B
hCov-19/PHI/Patient-30/2021	2021-10-23	Philippines	19	Male	Asian	Not vaccinated				17.5	92.28	99.75	1.23059	BA.2
hCov-19/PAK/Patient-31/2022	2022-01-10	Pakistan	21	Male	Asian	24-Jun-2021	CoronaVac	05-Aug-2021	CoronaVac	20.5	91.31	97.1	0.560585	BA.1
hCov-19/PHI/Patient-32/2022	2022-01-02	Philippines	23	Female	Asian	Not vaccinated				15.6	92.71	99.75	1.35449	BA.2
hCov-19/PHI/Patient-33/2022	2022-01-03	Philippines	26	Female	Asian	Not vaccinated				16.5	92.47	99.27	0.610805	BA.2
hCov-19/PHI/Patient-34/2022	2022-01-11	Philippines	28	Female	Asian	Not vaccinated				18.1	91.75	97.37	1.93852	BA.2
hCov-19/PHI/Patient-35/2022	2022-01-06	Philippines	19	Female	Asian	Not vaccinated				18.7	92.13	98.16	1.40291	BA.2
hCov-19/PHI/Patient-36/2022	2021-01-03	Philippines	35	Male	Asian	Not vaccinated				17.1	91.68	90.93	0.795116	BA.2
hCov-19/PHI/Patient-37/2022	2022-01-06	Philippines	26	Female	Asian	Not vaccinated				19	91.98	99.34	1.76718	BA.2
hCov-19/PHI/Patient-38/2022	2022-01-10	Philippines	47	Female	Asian	Not vaccinated				16.5	90.97	84.39	2	BA.2
hCov-19/PHI/Patient-39/2022	2022-01-05	Philippines	32	Female	Asian	Not vaccinated				18.1	90.74	90.24	1.82868	BA.2
hCov-19/PHI/Patient-40/2022	2022-01-05	Philippines	41	Female	Asian	Not vaccinated				18.1	92.08	99.58	1.60942	BA.2
hCov-19/PHI/Patient-41/2022	2022-01-10	Philippines	26	Male	Asian	Not vaccinated				20	92.59	99.75	2	BA.2
hCov-19/PHI/Patient-42/2022	2022-01-10	Philippines	28	Male	Asian	Not vaccinated				17.7	92.36	99.75	1.28879	BA.2
hCov-19/PHI/Patient-43/2022	2022-01-12	Philippines	31	Male	Asian	Not vaccinated				19	91.5	72.63	1.67582	BA.2
hCov-19/PHI/Patient-44/2022	2022-01-12	Philippines	58	Male	Asian	Not vaccinated				19	90.05	91.24	1.93852	BA.2
hCov-19/PHI/Patient-45/2022	2022-01-07	Philippines	30	Female	Asian	Not vaccinated				19.1	90.91	99.21	1.85156	BA.2
hCov-19/PHI/Patient-46/2022	2022-01-11	Philippines	24	Male	Asian	Not vaccinated				19.5	92.65	99.04	1.85567	BA.2
hCov-19/PHI/Patient-47/2022	2022-01-12	Philippines	28	Male	Asian	Not vaccinated				18.5	91.17	81.91	1.52699	BA.2
hCov-19/PHI/Patient-48/2022	2022-01-10	Philippines	35	Female	Asian	Not vaccinated				18.6	92.24	99.64	2	BA.2
hCov-19/PHI/Patient-49/2021	2021-11-18	Philippines	46	Female	Asian	Not vaccinated				17.8	92.19	99.75	2	B.1
hCov-19/PHI/Patient-50/2022	2022-01-12	Philippines	40	Male	Asian	Not vaccinated				19.3	90.97	92.44	2	BA.2
hCov-19/PHI/Patient-51/2022	2022-01-20	Pakistan	51	Male	Asian	09-MAY-2021	BBIBP-CorV	19-JUN-2021	BBIBP-CorV	17.1	89.53	82.3	2	BA.1
hCov-19/PAK/Patient-52/2022	2022-01-21	Pakistan	35	Male	Asian	05-May-2021	CoronaVac	03-Jun-2021	CoronaVac	NoCt	92.06	99.75	1.84124	BA.1
hCov-19/PAK/Patient-53/2022	2022-01-17	Pakistan	41	Male	Asian	06-Aug-2021	CoronaVac	07-Sep-2021	CoronaVac	24.1	91.59	82.34	1.72005	B
hCov-19/PAK/Patient-54/2022	2022-01-25	Pakistan	31	Female	Asian	07-Jun-2021	CoronaVac	03-Aug-2021	CoronaVac	26.3	91.21	90.69	0.893942	BA.1
hCov-19/PAK/Patient-55/2022	2022-01-20	Pakistan	29	Male	Asian	14-Jul-2021	CoronaVac	25-Aug-2021	CoronaVac	23.3	91.46	97.39	0.724292	BA.1
hCov-19/PAK/Patient-56/2022	2022-01-24	Pakistan	24	Male	Asian	26-Feb-2021	BBIBP-CorV	15-Jun-2021	BBIBP-CorV	26	88.57	69.33	2	BA.1
hCov-19/PAK/Patient-57/2022	2022-01-24	Pakistan	25	Male	Asian	31-Jul-2021	CoronaVac	03-Sep-2021	CoronaVac	23.3	91.4	93.35	1.10656	BA.1
hCov-19/PAK/Patient-58/2022	2022-01-19	Pakistan	23	Male	Asian	23-Jun-2021	CoronaVac	28-Jul-2021	CoronaVac	26.2	89.17	95.01	0.824428	BA.1
hCov-19/PAK/Patient-59/2022	2022-01-26	Pakistan	35	Male	Asian	10-Jun-2021	CoronaVac	28-Jul-2021	CoronaVac	27.8	92.22	78.03	1.82389	B
hCov-19/PAK/Patient-60/2022	2022-01-26	Pakistan	35	Male	Asian	21-Jun-2021	CoronaVac	02-Aug-2021	CoronaVac	26.6	92.73	71.41	1.08492	B
hCov-19/PAK/Patient-61/2022	2022-01-17	Pakistan	22	Female	Asian	21-Jun-2021	CoronaVac	30-Jul-2021	CoronaVac	27.4	89.68	97.38	2	BA.1
hCov-19/PAK/Patient-62/2022	2022-01-20	Philippines	27	Male	Asian	Not vaccinated				20.8	88.5	92.02	1.66733	BA.1
hCov-19/PHI/Patient-63/2022	2022-01-14	Philippines	24	Male	Asian	Not vaccinated				18.2	88.26	97.24	1.84473	BA.2
hCov-19/PHI/Patient-64/2021	2021-11-26	Philippines	43	Male	Asian	Not vaccinated				19.2	88.47	89.24	1.51723	B
hCov-19/PHI/Patient-65/2022	2022-01-21	Philippines	25	Male	Asian	Not vaccinated				18.7	88.39	99.26	1.64788	BA.2
hCov-19/PHI/Patient-66/2022	2022-01-10	Philippines	31	Male	Asian	Not vaccinated				18.5	88.45	96.38	1.69174	BA.2
hCov-19/PHI/Patient-67/2022	2022-01-20	Philippines	33	Male	Asian	Not vaccinated				18.2	89.25	99.46	2	BA.2
hCov-19/PHI/Patient-68/2022	2022-01-11	Philippines	56	Male	Asian	Not vaccinated				19.2	90.96	90.45	1.89086	B
hCov-19/PHI/Patient-69/2022	2022-01-19	Philippines	38	Male	Asian	Not vaccinated				20.3	90.38	92.78	1.73318	B
hCov-19/PHI/Patient-70/2022	2022-01-19	Philippines	24	Male	Asian	Not vaccinated				18.1	90.16	92.99	1.72785	BA.1
hCov-19/PHI/Patient-71/2022	2022-01-24	Philippines	34	Male	Asian	Not vaccinated				20	92.13	99.75	2	BA.2
hCov-19/PHI/Patient-72/2022	2022-01-21	Philippines	60	Male	Asian	Not vaccinated				19.8	91.2	99.75	2	BA.2
hCov-19/PHI/Patient-73/2022	2022-01-19	Philippines	25	Male	Asian	Not vaccinated				18.2	89.83	99.75	1.79653	BA.2
hCov-19/PHI/Patient-74/2022	2022-01-20	Philippines	19	Female	Asian	Not vaccinated				17.4	90.38	95.87	2	BA.2
hCov-19/PHI/Patient-75/2022	2022-01-14	Philippines	18	Male	Asian	Not vaccinated				18.4	90.56	85.05	0.941332	B
hCov-19/PHI/Patient-76/2022	2022-01-13	Philippines	36	Male	Asian	Not vaccinated				20.8	90.36	99.75	2	BA.2
hCov-19/PHI/Patient-77/2022	2022-01-14	Philippines	52	Female	Asian	Not vaccinated				18.8	89.1	97.79	1.51447	BA.2
hCov-19/PHI/Patient-78/2022	2022-01-14	Philippines	28	Male	Asian	Not vaccinated				18.3	90.82	99.75	1.33912	BA.2
hCov-19/PHI/Patient-79/2022	2022-01-14	Philippines	44	Female	Asian	Not vaccinated				18.9	90.3	99.75	0.985856	BA.2
hCov-19/PHI/Patient-80/2022	2022-01-14	Philippines	49	Female	Asian	Not vaccinated				21.2	90.47	99.75	2	BA.2
hCov-19/PHI/Patient-81/2022	2022-01-14	Philippines	30	Female	Asian	Not vaccinated				17.6	90.94	99.75	1.47757	BA.2
hCov-19/PHI/Patient-82/2022	2022-01-14	Philippines	54	Female	Asian	Not vaccinated				17.8	90.65	99.75	1.78412	BA.2
hCov-19/PHI/Patient-83/2022	2022-01-17	Philippines	36	Male	Asian	Not vaccinated				19.3	89.56	99.36	1.8734	BA.2
hCov-19/PHI/Patient-84/2022	2022-01-12	Philippines	57	Female	Asian	Not vaccinated				17.8	90.34	86.21	1.77545	B
hCov-19/PHI/Patient-85/2021	2021-12-29	Philippines	35	Male	Asian	Not vaccinated				19	91.78	96.35	1.93295	BA.1
hCov-19/PHI/Patient-86/2022	2022-01-08	Philippines	22	Female	Asian	Not vaccinated				17.7	88.78	71.09	1.24552	BA.2
hCov-19/PHI/Patient-87/2022	2022-01-18	Philippines	57	Female	Asian	Not vaccinated				18.3	88.16	71.02	1.49093	BA.2
hCov-19/PHI/Patient-88/2022	2022-01-14	Philippines	40	Male	Asian	Not vaccinated				17.7	89.43	90.5	1.62787	BA.2
hCov-19/PHI/Patient-89/2022	2022-01-03	Philippines	32	Male	Asian	Not vaccinated				19.9	88.08	74.37	1.42279	BA.2
hCov-19/PHI/Patient-90/2022	2022-01-19	Philippines	19	Male	Asian	Not vaccinated				16.5	89.78	79.68	1.52898	BA.2
hCov-19/PHI/Patient-91/2022	2022-01-19	Philippines	23	Female	Asian	Not vaccinated				17.6	88.01	75.81	1.42698	BA.2
hCov-19/PHI/Patient-92/2022	2022-01-14	Philippines	54	Female	Asian	Not vaccinated				17	88.71	86.58	1.38675	BA.2
