# Supplementary material for: Genomic Surveillance of SARS-CoV-2 Variants That Emerged in South and Southeast Asia during Early 2022
Source: Viruses. 2023 Jun 12;15(6):1355. doi: 10.3390/v15061355 (PMC10301783; doi:10.3390/v15061355)
Supplement: Supplementary file 1 [file viruses-15-01355-s001.zip › Table S2.xlsx]

## Sheet: Sheet1
Mutation types of each site
CDSs	Mutation type
	A-C	A-T	A-G	C-A	C-T	C-G	G-C	G-A	G-T	T-A	T-C	T-G
ORF1ab	30	41	74	0	95	19	0	0	54	0	0	0
S	53	87	89	0	65	26	0	0	63	0	0	0
ORF3a	0	0	0	0	10	0	0	0	3	0	0	0
E	0	0	0	0	2	0	0	0	1	0	0	0
M	1	0	6	0	2	1	0	0	1	0	0	0
ORF6	0	1	0	0	1	1	0	0	0	0	0	0
ORF7a	0	1	1	0	5	0	0	0	2	0	0	0
ORF7b	0	0	0	0	2	0	0	0	0	0	0	0
ORF8	0	0	1	0	2	0	0	0	0	0	0	0
N	3	0	6	0	4	1	0	0	3	0	0	0
ORF10	0	0	1	0	0	0	0	0	0	0	0	0
nsp1	12	8	14	0	11	6	0	0	5	0	0	0
nsp2	0	0	2	0	8	0	0	0	0	0	0	0
nsp3	13	15	31	0	22	7	0	0	12	0	0	0
nsp4	0	1	4	0	10	0	0	0	2	0	0	0
3CL-PRO	1	0	2	0	3	0	0	0	1	0	0	0
nsp6	2	16	5	0	9	5	0	0	18	0	0	0
nsp7	0	0	0	0	0	0	0	0	0	0	0	0
nsp8	0	0	0	0	2	0	0	0	0	0	0	0
nsp9	1	0	0	0	0	0	0	0	0	0	0	0
nsp10	0	0	2	0	0	0	0	0	0	0	0	0
nsp11	0	0	0	0	0	0	0	0	0	0	0	0
Hel	0	0	1	0	5	0	0	0	3	0	0	0
ExoN	0	0	2	0	7	0	0	0	4	0	0	0
nsp15	0	0	1	0	3	0	0	0	2	0	0	0
nsp16	0	0	3	0	5	0	0	0	0	0	0	0
Pol	1	1	7	0	10	1	0	0	7	0	0	0
